# Supplementary material for: Induction of Recombinant Lectin Expression by an Artificially Constructed Tandem Repeat Structure: A Case Study Using Bryopsis plumosa Mannose-Binding Lectin
Source: PubMed Central journal article supplement (PMC6316659; doi:10.3390/biom8040146), 2018-11-14
Supplement: biomolecules-08-00146-s001.pdf [file biomolecules-08-00146-s001.pdf]

1 **Supplementary files**

2

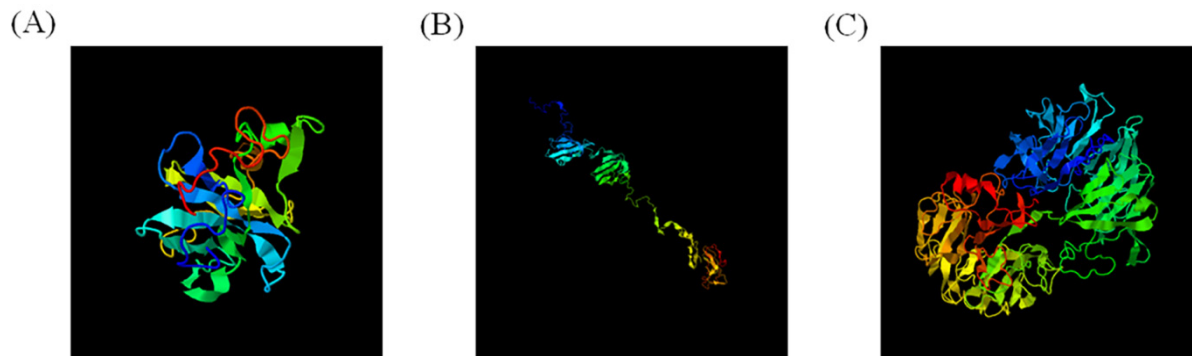

3

4 **Figure S1.** Predicted three-dimensional structure of BPL2. The structure was determined by protein  
5 sequence similarity analysis using the I-TASSER program ([https://zhanglab.ccmb.med.umich.edu/I-](https://zhanglab.ccmb.med.umich.edu/I-TASSER/)  
6 TASSER/) with normal parameters; a higher C score indicates a model with a higher confidence. (A)  
7 Native BPL2, C score =  $-2.64$ . (B) rD2BPL2, C score =  $-2.86$ . (C) rD4BPL2.

8 **Table S1.** Glycan microarray of native BPL2, with binding signals normalized using a program provided by RayBioTech

| Substrate | Glycan structure                            | Normalized RFU |     |
|-----------|---------------------------------------------|----------------|-----|
|           |                                             | Mean           | SD  |
| POS1      | –                                           | 5687           | 0   |
| NEG       | -                                           | 370            | 25  |
| G0001     | β-Glc-Sp                                    | 1785           | 853 |
| G0002     | β-Gal-Sp                                    | 1708           | 519 |
| G0003     | α-Man-Sp                                    | 1794           | 461 |
| G0004     | α-Fuc-Sp                                    | 270            | 17  |
| G0005     | α-Rha-Sp                                    | 227            | 46  |
| G0006     | β-GlcNAc-Sp                                 | 814            | 201 |
| G0007     | β-GalNAc-Sp                                 | 616            | 120 |
| G0008     | Tobramycin                                  | 823            | 189 |
| G0009     | Gal-β-1,3-GlcNAc-β-Sp                       | 363            | 71  |
| G0010     | Gal-α-1,3-Gal-β-1,3-GlcNAc-β-Sp             | 212            | 57  |
| G0011     | Neu5Ac-α-2,3-Gal-β-1,3-GlcNAc-β-Sp          | 452            | 125 |
| G0012     | Neu5Ac-α-2,6-Gal-β-1,3-GlcNAc-β-Sp          | 409            | 117 |
| G0013     | Neu5Gc-α-2,3-Gal-β-1,3-GlcNAc-β-Sp          | 381            | 78  |
| G0014     | Neu5Gc-α-2,6-Gal-β-1,3-GlcNAc-β-Sp          | 422            | 115 |
| G0015     | Gal-β-1,3-(Fuc-α-1,4)-GlcNAc-β-[Lewis A]-Sp | 394            | 35  |
| G0016     | Gal-β-1,4-Glc-β-Sp                          | 905            | 162 |
| G0017     | Gal-α-1,3-Gal-β-1,4-Glc-β-Sp                | 251            | 95  |
| G0018     | Gal-α-1,4-Gal-β-1,4-Glc-β-Sp                | 846            | 205 |
| G0019     | GlcNAc-β-1,3-Gal-β-1,4-Glc-β-Sp             | 519            | 72  |
| G0020     | GalNAc-β-1,3-Gal-β-1,4-Glc-β-Sp             | 731            | 272 |
| G0021     | Neu5Ac-α-2,3-Gal-β-1,4-Glc-β-Sp             | 198            | 28  |

|              |                                                                                                          |     |     |
|--------------|----------------------------------------------------------------------------------------------------------|-----|-----|
| <b>G0022</b> | Neu5Ac- $\alpha$ -2,6-Gal- $\beta$ -1,4-Glc- $\beta$ -Sp                                                 | 439 | 129 |
| <b>G0023</b> | Neu5Gc- $\alpha$ -2,3-Gal- $\beta$ -1,4-Glc- $\beta$ -Sp                                                 | 425 | 175 |
| <b>G0024</b> | Neu5Ac- $\alpha$ -2,6-Gal- $\beta$ -1,4-Glc- $\beta$ -Sp                                                 | 484 | 183 |
| <b>G0025</b> | Gal- $\beta$ -1,4-(Fuc- $\alpha$ -1,3)-Glc- $\beta$ -Sp                                                  | 498 | 37  |
| <b>G0026</b> | GalNAc- $\beta$ -1,3-Gal- $\alpha$ -1,4-Gal- $\beta$ -1,4-Glc- $\beta$ -Sp                               | 146 | 12  |
| <b>G0027</b> | GlcNAc- $\beta$ -1,6-GlcNAc- $\beta$ -Sp                                                                 | 432 | 11  |
| <b>G0028</b> | 4-P-GlcNAc-b-1,4-Man-b-Sp                                                                                | 350 | 27  |
| <b>G0029</b> | Glc- $\alpha$ -1,2-Gal- $\alpha$ -1,3-Glc- $\alpha$ -Sp                                                  | 359 | 121 |
| <b>G0030</b> | Gal- $\beta$ -1,3-GalNAc- $\alpha$ -Sp                                                                   | 295 | 53  |
| <b>G0031</b> | Gal- $\beta$ -1,4-GlcNAc- $\beta$ -Sp                                                                    | 562 | 149 |
| <b>G0032</b> | Gal- $\beta$ -1,4-(Fuc- $\alpha$ -1,3)-GlcNAc- $\beta$ -[Lewis X]-Sp                                     | 449 | 152 |
| <b>G0033</b> | Neu5Ac- $\alpha$ -2,3-Gal- $\beta$ -1,4-(Fuc- $\alpha$ -1,3)-GlcNAc- $\beta$ -[sialyl Lewis X]-Sp        | 329 | 63  |
| <b>G0034</b> | Neu5Ac- $\alpha$ -2,3-Gal- $\beta$ -1,3-(Fuc- $\alpha$ -1,4)-GlcNAc- $\beta$ -[sialyl Lewis A]-Sp        | 202 | 93  |
| <b>G0035</b> | Neu5Gc- $\alpha$ -2,3-Gal- $\beta$ -1,3-(Fuc- $\alpha$ -1,4)-GlcNAc- $\beta$ -[sialyl Lewis A]-Sp        | 156 | 34  |
| <b>G0036</b> | Gal- $\alpha$ -1,4-Gal- $\beta$ -1,3-GlcNAc- $\beta$ -Sp                                                 | 299 | 61  |
| <b>G0037</b> | Gal- $\beta$ -1,4-GlcNAc- $\beta$ -1,3-Gal- $\beta$ -1,4-Glc- $\beta$ -[LNnT]-Sp                         | 254 | 68  |
| <b>G0038</b> | GlcA- $\beta$ -1,4-GlcNAc- $\alpha$ -1,4-GlcA- $\beta$ -Sp                                               | 192 | 66  |
| <b>G0039</b> | GlcNAc- $\beta$ -1,6-(Gal- $\beta$ -1,3)-GalNAc- $\alpha$ -O-Ser-Sp4                                     | 15  | 6   |
| <b>G0040</b> | Neu5Ac- $\alpha$ -2,3Gal- $\beta$ -1,4-(6S)GlcNAc- $\beta$ -Sp                                           | 331 | 43  |
| <b>G0041</b> | GalNAc- $\beta$ -1,4-GlcNAc- $\beta$ -Sp2                                                                | 379 | 41  |
| <b>G0042</b> | Neu5Ac- $\alpha$ -2,8-Neu5Ac- $\alpha$ -2,3-Gal $\beta$ -1,4-Glc- $\beta$ -Sp                            | 85  | 23  |
| <b>G0043</b> | Neu5Gc- $\alpha$ -2,8-Neu5Ac- $\alpha$ -2,3-Gal- $\beta$ -1,4-Glc- $\beta$ -Sp                           | 219 | 48  |
| <b>G0044</b> | GalNAc- $\alpha$ -1,3-(Fuc- $\alpha$ -1,2)-Gal- $\beta$ -1,4-Glc- $\beta$ -[blood A antigen tetrose]-Sp1 | 114 | 1   |
| <b>G0045</b> | GlcNAc- $\beta$ -1,2-Man- $\alpha$ -Sp                                                                   | 146 | 2   |
| <b>G0046</b> | Neu5Ac- $\alpha$ -2,3-Gal- $\beta$ -Sp1                                                                  | 215 | 22  |
| <b>G0047</b> | Gal- $\beta$ -1,3-GalNAc- $\beta$ -1,3-Gal- $\beta$ -Sp1                                                 | 102 | 25  |
| <b>G0048</b> | Glc- $\alpha$ -1,2-Gal- $\alpha$ -Sp                                                                     | 767 | 172 |

|              |                                                                                                                                |      |     |
|--------------|--------------------------------------------------------------------------------------------------------------------------------|------|-----|
| <b>G0049</b> | Gal- $\beta$ -1,4-(Fuc- $\alpha$ -1,3)-GlcNAc- $\beta$ -1,3-Gal- $\beta$ -Sp1                                                  | 281  | 29  |
| <b>G0050</b> | Neu5Ac- $\alpha$ -2,3-Gal- $\beta$ -1,4-(Fuc- $\alpha$ -1,3)-Glc- $\beta$ -[3-sialyl-3-fucosyllactose/F-SL]-Sp1                | 173  | 70  |
| <b>G0051</b> | GlcNAc- $\beta$ -1,4-GlcNAc- $\beta$ -Sp1                                                                                      | 410  | 142 |
| <b>G0052</b> | $\beta$ -D-GlcA-Sp                                                                                                             | 736  | 276 |
| <b>G0053</b> | Gal- $\beta$ -1,4-(6S)GlnAc- $\beta$ -Sp                                                                                       | 424  | 94  |
| <b>G0054</b> | GlcNAc- $\alpha$ -1,3-(Glc- $\alpha$ -1,2-Glc- $\alpha$ -1,2)-Gal- $\alpha$ -1,3-Glc- $\alpha$ -Sp                             | 124  | 53  |
| <b>G0055</b> | Gal- $\beta$ -1,3-GalNAc- $\beta$ -1,4-(Neu5Gc- $\alpha$ -2,3)-Gal- $\beta$ -1,4-Glc- $\beta$ -Sp1                             | 173  | 16  |
| <b>G0056</b> | Sisomicin sulfate                                                                                                              | 1652 | 370 |
| <b>G0057</b> | GalNAc- $\alpha$ -1,3-(Fuc- $\alpha$ -1,2)-Gal- $\beta$ -[blood A antigen trisaccharide]-Sp1                                   | 524  | 88  |
| <b>G0058</b> | Fuc- $\alpha$ -1,2-Gal- $\beta$ -1,4-GlcNAc- $\beta$ -[blood H antigen trisaccharide]-Sp1                                      | 295  | 77  |
| <b>G0059</b> | Gal- $\alpha$ -1,3-(Fuc- $\alpha$ -1,2)-Gal- $\beta$ -[blood B antigen trisaccharide]-Sp1                                      | 364  | 91  |
| <b>G0060</b> | Fuc- $\alpha$ -1,2-Gal- $\beta$ -1,3-GlcNAc- $\beta$ -1,3-Gal- $\beta$ -1,4-Glc- $\beta$ [LNFP I]-Sp1                          | 597  | 151 |
| <b>G0061</b> | Fuc- $\alpha$ -1,2-Gal- $\beta$ -1,4-Glc- $\beta$ -[blood H antigen trisaccharide]-Sp1                                         | 282  | 58  |
| <b>G0062</b> | Gal- $\alpha$ -1,3-(Fuc- $\alpha$ -1,2)-Gal- $\beta$ -1,4-Glc- $\beta$ -[blood B antigen tetrasaccharide]-Sp1                  | 189  | 30  |
| <b>G0063</b> | (Fuc- $\alpha$ -1,2)-Gal- $\beta$ -1,4-(Fuc- $\alpha$ -1,3)-GlcNAc- $\beta$ -[Lewis Y]-Sp1                                     | 288  | 60  |
| <b>G0064</b> | (Fuc- $\alpha$ -1,2)-Gal- $\beta$ -1,3-(Fuc- $\alpha$ -1,4)-GlcNAc- $\beta$ -[Lewis B]-Sp1                                     | 137  | 8   |
| <b>G0065</b> | Gal- $\beta$ -1,3-(Fuc- $\alpha$ -1,4)-GlcNAc- $\beta$ -1,3-Gal- $\beta$ -1,4-(Fuc- $\alpha$ -1,4)-Glc- $\beta$ -[Lewis A]-Sp1 | 160  | 33  |
| <b>G0066</b> | Gal- $\beta$ -1,3-GalNAc- $\beta$ -Sp1                                                                                         | 109  | 16  |
| <b>G0067</b> | Gal- $\beta$ -1,3-(Neu5Ac- $\alpha$ -2,6)-GalNAc- $\beta$ -Sp                                                                  | 308  | 31  |
| <b>G0068</b> | Neu5Ac- $\alpha$ -2,6-Gal- $\beta$ -1,3-GalNAc- $\beta$ -Sp                                                                    | 444  | 105 |
| <b>G0069</b> | Neu5Ac- $\alpha$ -2,6-Gal- $\beta$ -1,3-(Neu5Ac- $\alpha$ -2,6)-GalNAc- $\beta$ -Sp                                            | 302  | 84  |
| <b>G0070</b> | Neu5Ac- $\alpha$ -2,3-Gal- $\beta$ -1,3-(Neu5Ac- $\alpha$ -2,6)-GalNAc- $\beta$ -Sp                                            | 237  | 29  |
| <b>G0071</b> | Neu5Ac- $\alpha$ -2,6-(Neu5Ac- $\alpha$ -2,3)-Gal- $\beta$ -1,3-GalNAc- $\beta$ -Sp                                            | 286  | 93  |
| <b>G0072</b> | GalNAc- $\beta$ -1,4-(Neu5Ac- $\alpha$ -2,3)-Gal- $\beta$ -1,4-Glc- $\beta$ -[GM2]-Sp                                          | 315  | 18  |
| <b>G0073</b> | GalNAc- $\beta$ -1,4-(Neu5Ac- $\alpha$ -2,8-Neu5Ac- $\alpha$ -2,3)-Gal- $\beta$ -1,4-Glc- $\beta$ -[GD2]-Sp                    | 16   | 1   |
| <b>G0074</b> | Gal- $\alpha$ -1,4-Gal- $\beta$ -1,4-GlcNAc- $\beta$ -Sp1                                                                      | 330  | 46  |
| <b>G0075</b> | $\beta$ -D-Rha-Sp                                                                                                              | 409  | 106 |

|              |                                                                                                                                                                          |        |     |
|--------------|--------------------------------------------------------------------------------------------------------------------------------------------------------------------------|--------|-----|
| <b>G0076</b> | Glc- $\alpha$ -1,4-Glc- $\beta$ -Sp1                                                                                                                                     | 1033   | 111 |
| <b>G0077</b> | Glc- $\alpha$ -1,6-Glc- $\alpha$ -1,4-Glc- $\beta$ -Sp1                                                                                                                  | 522    | 187 |
| <b>G0078</b> | Maltotriose- $\beta$ -Sp1                                                                                                                                                | 657    | 144 |
| <b>G0079</b> | Glc- $\alpha$ -1,6-Glc- $\alpha$ -1,6-Glc- $\beta$ -Sp1                                                                                                                  | 628    | 121 |
| <b>G0080</b> | Maltotetraose- $\beta$ -Sp1                                                                                                                                              | 1227   | 119 |
| <b>G0081</b> | GlcNAc- $\alpha$ -1,4-GlcA- $\beta$ -1,4-GlcNAc- $\alpha$ 1,4-GlcA- $\beta$ -Sp                                                                                          | 139    | 32  |
| <b>G0082</b> | Maltohexaose- $\beta$ -Sp1                                                                                                                                               | 8432   | 100 |
| <b>G0083</b> | Maltoheptaose- $\beta$ -Sp1                                                                                                                                              | 10,095 | 285 |
| <b>G0084</b> | Acarbose- $\beta$ -Sp1                                                                                                                                                   | 570    | 83  |
| <b>G0085</b> | D-Pentamannuronic acid- $\beta$ -Sp1                                                                                                                                     | 447    | 81  |
| <b>G0086</b> | L-Pentaguluronic acid- $\beta$ -Sp1                                                                                                                                      | 610    | 205 |
| <b>G0087</b> | D-Cellose- $\beta$ -Sp1                                                                                                                                                  | 929    | 280 |
| <b>G0088</b> | Gal- $\alpha$ -1,3-Gal- $\beta$ -Sp1                                                                                                                                     | 690    | 42  |
| <b>G0089</b> | $\beta$ -1,4-Xylotetrose-Sp1                                                                                                                                             | 262    | 46  |
| <b>G0090</b> | Chitin-trisaccharide-Sp1                                                                                                                                                 | 304    | 58  |
| <b>G0091</b> | KDN- $\alpha$ -2,8-Neu5Ac- $\alpha$ -2,3-Gal- $\beta$ -1,4-Glc- $\beta$ -Sp                                                                                              | 55     | 4   |
| <b>G0092</b> | Neu5Ac- $\alpha$ -2,8-Neu5Gc- $\alpha$ -2,3-Gal- $\beta$ -1,4-Glc- $\beta$ -Sp                                                                                           | 183    | 72  |
| <b>G0093</b> | Neu5Ac- $\alpha$ -2,8-Neu5Ac- $\alpha$ -2,8-Neu5Ac- $\alpha$ -2,3-Gal- $\beta$ -1,4-Glc- $\beta$ -Sp3                                                                    | 64     | 10  |
| <b>G0094</b> | Neu5Ac-a-2,8-Neu5Ac-a-2,6-Gal-b-1,4-Glc-Sp5                                                                                                                              | 14     | 6   |
| <b>G0095</b> | Gal- $\beta$ -1,3-GalNAc- $\beta$ -1,4-(Neu5Ac- $\alpha$ -2,3)-Gal- $\beta$ -1,4-Glc- $\beta$ -Sp1                                                                       | 157    | 30  |
| <b>G0096</b> | Gentamicin sulfate                                                                                                                                                       | 401    | 48  |
| <b>G0097</b> | Kanamycin sulfate                                                                                                                                                        | 773    | 201 |
| <b>G0098</b> | Geneticin disulfate salt (G418)                                                                                                                                          | 156    | 4   |
| <b>G0099</b> | Neomycin trisulfate                                                                                                                                                      | 1094   | 305 |
| <b>G0100</b> | SGP                                                                                                                                                                      | 184    | 57  |
| <b>N010</b>  | Man- $\alpha$ -1,6-(Man- $\alpha$ -1,3-)Man- $\alpha$ -1,6-(GlcNAc- $\beta$ -1,2-Man- $\alpha$ -1,3-)Man- $\beta$ -1,4-GlcNAc- $\beta$ -1,4-GlcNAc-Sp5                   | 145    | 38  |
| <b>N011</b>  | Man- $\alpha$ -1,6-(Man- $\alpha$ -1,3-)Man- $\alpha$ -1,6-(Gal- $\beta$ -1,4-GlcNAc- $\beta$ -1,2-Man- $\alpha$ -1,3-)Man- $\beta$ -1,4-GlcNAc- $\beta$ -1,4-GlcNAc-Sp5 | 106    | 13  |

|              |                                                                                                                                                                                                                     |     |    |
|--------------|---------------------------------------------------------------------------------------------------------------------------------------------------------------------------------------------------------------------|-----|----|
| <b>N012</b>  | Man- $\alpha$ -1,6-(Man- $\alpha$ -1,3-)Man- $\alpha$ -1,6-(Neu5Ac- $\alpha$ -2,3-Gal- $\beta$ -1,4-GlcNAc- $\beta$ -1,2-Man- $\alpha$ -1,3-)Man- $\beta$ -1,4-GlcNAc- $\beta$ -1,4-GlcNAc-Sp5                      | 86  | 13 |
| <b>N013</b>  | Man- $\alpha$ -1,6-(Man- $\alpha$ -1,3-)Man- $\alpha$ -1,6-(Neu5Ac- $\alpha$ -2,6-Gal- $\beta$ -1,4-GlcNAc- $\beta$ -1,2-Man- $\alpha$ -1,3-)Man- $\beta$ -1,4-GlcNAc- $\beta$ -1,4-GlcNAc-Sp5                      | 95  | 16 |
| <b>N014</b>  | Man- $\alpha$ -1,6-(Man- $\alpha$ -1,3-)Man- $\alpha$ -1,6-[Gal- $\beta$ -1,4-(Fuc- $\alpha$ -1,3-)GlcNAc- $\beta$ -1,2-Man- $\alpha$ -1,3-]Man- $\beta$ -1,4-GlcNAc- $\beta$ -1,4-GlcNAc-Sp5                       | 120 | 10 |
| <b>N015</b>  | Man- $\alpha$ -1,6-(Man- $\alpha$ -1,3-)Man- $\alpha$ -1,6-[Neu5Ac- $\alpha$ -2,3-Gal- $\beta$ -1,4-(Fuc- $\alpha$ -1,3-)GlcNAc- $\beta$ -1,2-Man- $\alpha$ -1,3-]Man- $\beta$ -1,4-GlcNAc- $\beta$ -1,4-GlcNAc-Sp5 | 117 | 5  |
| <b>N020</b>  | GlcNAc- $\beta$ -1,2-Man- $\alpha$ -1,3-Man- $\beta$ -1,4-GlcNAc- $\beta$ -1,4-GlcNAc-Sp5                                                                                                                           | 208 | 23 |
| <b>N021</b>  | Gal- $\beta$ -1,4-GlcNAc- $\beta$ -1,2-Man- $\alpha$ -1,3-Man- $\beta$ -1,4-GlcNAc- $\beta$ -1,4-GlcNAc-Sp5                                                                                                         | 144 | 12 |
| <b>N022</b>  | Neu5Ac- $\alpha$ -2,3-Gal- $\beta$ -1,4-GlcNAc- $\beta$ -1,2-Man- $\alpha$ -1,3-Man- $\beta$ -1,4-GlcNAc- $\beta$ -1,4-GlcNAc-Sp5                                                                                   | 106 | 25 |
| <b>N023</b>  | Neu5Ac- $\alpha$ -2,6-Gal- $\beta$ -1,4-GlcNAc- $\beta$ -1,2-Man- $\alpha$ -1,3-Man- $\beta$ -1,4-GlcNAc- $\beta$ -1,4-GlcNAc-Sp5                                                                                   | 127 | 16 |
| <b>N024</b>  | Gal- $\beta$ -1,4-(Fuc- $\alpha$ -1,3-)GlcNAc- $\beta$ -1,2-Man- $\alpha$ -1,3-Man- $\beta$ -1,4-GlcNAc- $\beta$ -1,4-GlcNAc-Sp5                                                                                    | 113 | 3  |
| <b>N025</b>  | Neu5Ac- $\alpha$ -2,3-Gal- $\beta$ -1,4-(Fuc- $\alpha$ -1,3-)GlcNAc- $\beta$ -1,2-Man- $\alpha$ -1,3-Man- $\beta$ -1,4-GlcNAc- $\beta$ -1,4-GlcNAc-Sp5                                                              | 86  | 9  |
| <b>N026</b>  | Gal- $\alpha$ -1,3-Gal- $\beta$ -1,4-GlcNAc- $\beta$ -1,2-Man- $\alpha$ -1,3-Man- $\beta$ -1,4-GlcNAc- $\beta$ -1,4-GlcNAc-Sp5                                                                                      | 109 | 12 |
| <b>N022G</b> | Neu5Gc- $\alpha$ -2,3-Gal- $\beta$ -1,4-GlcNAc- $\beta$ -1,2-Man- $\alpha$ -1,3-Man- $\beta$ -1,4-GlcNAc- $\beta$ -1,4-GlcNAc-Sp5                                                                                   | 97  | 5  |
| <b>N023G</b> | Neu5Gc- $\alpha$ -2,6-Gal- $\beta$ -1,4-GlcNAc- $\beta$ -1,2-Man- $\alpha$ -1,3-Man- $\beta$ -1,4-GlcNAc- $\beta$ -1,4-GlcNAc-Sp5                                                                                   | 160 | 5  |
| <b>N025G</b> | Neu5Gc- $\alpha$ -2,3-Gal- $\beta$ -1,4-(Fuc- $\alpha$ -1,3-)GlcNAc- $\beta$ -1,2-Man- $\alpha$ -1,3-Man- $\beta$ -1,4-GlcNAc- $\beta$ -1,4-GlcNAc-Sp5                                                              | 92  | 10 |
| <b>N030</b>  | Man- $\alpha$ -1,6-(GlcNAc- $\beta$ -1,2-Man- $\alpha$ -1,3-)Man- $\beta$ -1,4-GlcNAc- $\beta$ -1,4-GlcNAc-Sp5                                                                                                      | 170 | 8  |
| <b>N210</b>  | GlcNAc- $\beta$ -1,2-Man- $\alpha$ -1,6-[GlcNAc(3Ac)- $\beta$ -1,2-Man- $\alpha$ -1,3-Man- $\beta$ -1,4-GlcNAc- $\beta$ -1,4-GlcNAc-Sp5                                                                             | 105 | 15 |
| <b>N040</b>  | GlcNAc- $\beta$ -1,2-Man- $\alpha$ -1,6-Man- $\beta$ -1,4-GlcNAc- $\beta$ -1,4-GlcNAc-Sp5                                                                                                                           | 132 | 14 |
| <b>N041</b>  | Gal- $\beta$ -1,4-GlcNAc- $\beta$ -1,2-Man- $\alpha$ -1,3-Man- $\beta$ -1,4-GlcNAc- $\beta$ -1,4-GlcNAc-Sp5                                                                                                         | 212 | 26 |
| <b>N042</b>  | Neu5Ac- $\alpha$ -2,3-Gal- $\beta$ -1,4-GlcNAc- $\beta$ -1,2-Man- $\alpha$ -1,3-Man- $\beta$ -1,4-GlcNAc- $\beta$ -1,4-GlcNAc-Sp5                                                                                   | 126 | 13 |
| <b>N043</b>  | Neu5Ac- $\alpha$ -2,6-Gal- $\beta$ -1,4-GlcNAc- $\beta$ -1,2-Man- $\alpha$ -1,3-Man- $\beta$ -1,4-GlcNAc- $\beta$ -1,4-GlcNAc-Sp5                                                                                   | 132 | 1  |
| <b>N044</b>  | Gal- $\beta$ -1,4-(Fuc- $\alpha$ -1,3-)GlcNAc- $\beta$ -1,2-Man- $\alpha$ -1,3-Man- $\beta$ -1,4-GlcNAc- $\beta$ -1,4-GlcNAc-Sp5                                                                                    | 163 | 19 |
| <b>N045</b>  | Neu5Ac- $\alpha$ -2,3-Gal- $\beta$ -1,4-(Fuc- $\alpha$ -1,3-)GlcNAc- $\beta$ -1,2-Man- $\alpha$ -1,3-Man- $\beta$ -1,4-GlcNAc- $\beta$ -1,4-GlcNAc-Sp5                                                              | 156 | 10 |
| <b>N050</b>  | GlcNAc- $\beta$ -1,2-Man- $\alpha$ -1,6-(Man- $\alpha$ -1,3-)Man- $\beta$ -1,4-GlcNAc- $\beta$ -1,4-GlcNAc-Sp5                                                                                                      | 324 | 59 |
| <b>N051</b>  | Gal- $\beta$ -1,4-GlcNAc- $\beta$ -1,2-Man- $\alpha$ -1,6-(Man- $\alpha$ -1,3-)Man- $\beta$ -1,4-GlcNAc- $\beta$ -1,4-GlcNAc-Sp5                                                                                    | 287 | 38 |
| <b>N052</b>  | Neu5Ac- $\alpha$ -2,3-Gal- $\beta$ -1,4-GlcNAc- $\beta$ -1,2-Man- $\alpha$ -1,6-(Man- $\alpha$ -1,3-)Man- $\beta$ -1,4-GlcNAc- $\beta$ -1,4-GlcNAc-Sp5                                                              | 155 | 10 |
| <b>N053</b>  | Neu5Ac- $\alpha$ -2,6-Gal- $\beta$ -1,4-GlcNAc- $\beta$ -1,2-Man- $\alpha$ -1,6-(Man- $\alpha$ -1,3-)Man- $\beta$ -1,4-GlcNAc- $\beta$ -1,4-GlcNAc-Sp                                                               | 149 | 41 |

|              |                                                                                                                                                             |     |    |
|--------------|-------------------------------------------------------------------------------------------------------------------------------------------------------------|-----|----|
| <b>N054</b>  | Gal-β-1,4-(Fuc-α-1,3-)GlcNAc-β-1,2-Man-α-1,6-(Man-α-1,3-)Man-β-1,4-GlcNAc-β-1,4-GlcNAc-Sp5                                                                  | 225 | 16 |
| <b>N055</b>  | Neu5Ac-α-2,3-Gal-β-1,4-(Fuc-α-1,3-)GlcNAc-β-1,2-Man-α-1,6-(Man-α-1,3-)Man-β-1,4-GlcNAc-β-1,4-GlcNAc-Sp5                                                     | 133 | 19 |
| <b>TE001</b> | Neu5Ac-α-2,6-Gal-β-1,4-GlcNAc-Man-α-1,3-(Neu5Ac-α-2,6-Gal-β-1,4-GlcNAc-Man-α-1,6-)Man-β-1,4-GlcNAc-β-1,4-GlcNAc-β-Asn                                       | 14  | 0  |
| <b>TE002</b> | Gal-β-1,4-GlcNAc-β-1,2-Man-α-1,3-(Gal-β-1,4-GlcNAc-β-1,2-Man-α-1,6-)Man-β-1,4-GlcNAc-β-1,4-GlcNAc-β-Asn                                                     | 6   | 2  |
| <b>TE003</b> | Neu5Gc-α-2,6-Gal-β-1,4-GlcNAc-β-1,2-Man-α-1,3-(Neu5Gc-α-2,6-Gal-β-1,4-GlcNAc-β-1,2-Man-α-1,6-)Man-β-1,4-GlcNAc-β-1,4-GlcNAc-β-Asn                           | 12  | 3  |
| <b>TE004</b> | Neu5Ac-α-2,3-Gal-β-1,4-GlcNAc-β-1,2-Man-α-1,3-(Neu5Ac-α-2,3-Gal-β-1,4-GlcNAc-β-1,2-Man-α-1,6-)Man-β-1,4-GlcNAc-β-1,4-GlcNAc-β-Asn                           | 34  | 4  |
| <b>TE005</b> | Neu5Gc-α-2,3-Gal-β-1,4-GlcNAc-β-1,2-Man-α-1,3-(Neu5Gc-α-2,3-Gal-β-1,4-GlcNAc-β-1,2-Man-α-1,6-)Man-β-1,4-GlcNAc-β-1,4-GlcNAc-β-Asn                           | 37  | 11 |
| <b>TE006</b> | Gal-β-1,4-(Fucα-1,3-)GlcNAc-β-1,2-Man-α-1,3-[Gal-β-1,4-(Fucα-1,3-)GlcNAc-β-1,2-Man-α-1,6-]Man-β-1,4-GlcNAc-β-1,4-GlcNAc-β-Asn                               | 12  | 3  |
| <b>TE007</b> | Gal-α-1,3-Gal-β-1,4-GlcNAc-β-1,2-Man-α-1,3-(Gal-α-1,3-Gal-β-1,4-GlcNAc-β-1,2-Man-α-1,6-)Man-β-1,4-GlcNAc-β-1,4-GlcNAc-β-Asn                                 | 8   | 1  |
| <b>TE008</b> | Gal-β-1,4-(Fucα-1,3-)GlcNAc-β-1,2-Man-α-1,3-[Gal-β-1,4-(Fucα-1,3-)GlcNAc-β-1,2-Man-α-1,6-]Man-β-1,4-GlcNAc-β-1,4-GlcNAc-β-Asn                               | 15  | 5  |
| <b>TE009</b> | Neu5Ac-α-2,8-Neu5Ac-α-2,6-Gal-β-1,4-GlcNAc-β-1,2-Man-α-1,3-(Neu5Ac-α-2,8-Neu5Ac-α-2,6-Gal-β-1,4-GlcNAc-β-1,2-Man-α-1,6-)Man-β-1,4-GlcNAc-β-1,4-GlcNAc-β-Asn | 4   | 4  |
| <b>TE010</b> | Neu5Gc-α-2,8-Neu5Ac-α-2,6-Gal-β-1,4-GlcNAc-β-1,2-Man-α-1,3-(Neu5Gc-α-2,8-Neu5Ac-α-2,6-Gal-β-1,4-GlcNAc-β-1,2-Man-α-1,6-)Man-β-1,4-GlcNAc-β-1,4-GlcNAc-β-Asn | 9   | 0  |
| <b>TE011</b> | Neu5Ac-α-2,8-Neu5Gc-α-2,6-Gal-β-1,4-GlcNAc-β-1,2-Man-α-1,3-(Neu5Ac-α-2,8-Neu5Gc-α-2,6-Gal-β-1,4-GlcNAc-β-1,2-Man-α-1,6-)Man-β-1,4-GlcNAc-β-1,4-GlcNAc-β-Asn | 8   | 2  |
| <b>TE012</b> | Neu5Gc-α-2,8-Neu5Gc-α-2,6-Gal-β-1,4-GlcNAc-β-1,2-Man-α-1,3-(Neu5Gc-α-2,8-Neu5Gc-α-2,6-Gal-β-1,4-GlcNAc-β-1,2-Man-α-1,6-)Man-β-1,4-GlcNAc-β-1,4-GlcNAc-β-Asn | 32  | 4  |
| <b>TE013</b> | Neu5Ac-α-2,8-Neu5Ac-α-2,3-Gal-β-1,4-GlcNAc-β-1,2-Man-α-1,3-(Neu5Ac-α-2,8-Neu5Ac-α-2,3-Gal-β-1,4-GlcNAc-β-1,2-Man-α-1,6-)Man-β-1,4-GlcNAc-β-1,4-GlcNAc-β-Asn | 11  | 2  |
| <b>TE014</b> | Neu5Gc-α-2,8-Neu5Ac-α-2,3-Gal-β-1,4-GlcNAc-β-1,2-Man-α-1,3-(Neu5Gc-α-2,8-Neu5Ac-α-2,3-Gal-β-1,4-GlcNAc-β-1,2-Man-α-1,6-)Man-β-1,4-GlcNAc-β-1,4-GlcNAc-β-Asn | 9   | 7  |
| <b>TE015</b> | Neu5Ac-α-2,8-Neu5Gc-α-2,3-Gal-β-1,4-GlcNAc-β-1,2-Man-α-1,3-(Neu5Ac-α-2,8-Neu5Gc-α-2,3-Gal-β-1,4-GlcNAc-β-1,2-Man-α-1,6-)Man-β-1,4-GlcNAc-β-1,4-GlcNAc-β-Asn | 1   | 0  |
| <b>TE016</b> | Neu5Gc-α-2,8-Neu5Gc-α-2,3-Gal-β-1,4-GlcNAc-β-1,2-Man-α-1,3-(Neu5Gc-α-2,8-Neu5Gc-α-2,3-Gal-β-1,4-GlcNAc-β-1,2-Man-α-1,6-)Man-β-1,4-GlcNAc-β-1,4-GlcNAc-β-Asn | 3   | 0  |
| <b>TE017</b> | Neu5Ac-α-2,3-Gal-β-1,4-(Fucα-1,3-)GlcNAc-β-1,2-Man-α-1,3-[Neu5Ac-α-2,3-Gal-β-1,4-(Fucα-1,3-)GlcNAc-β-1,2-Man-α-1,6-]Man-β-1,4-GlcNAc-β-1,4-GlcNAc-β-Asn     | 9   | 1  |
| <b>TE018</b> | Neu5Gc-α-2,3-Gal-β-1,4-(Fucα-1,3-)GlcNAc-β-1,2-Man-α-1,3-[Neu5Gc-α-2,3-Gal-β-1,4-(Fucα-1,3-)GlcNAc-β-1,2-Man-α-1,6-]Man-β-1,4-GlcNAc-β-1,4-GlcNAc-β-Asn     | 2   | 1  |







|              |                                                                                                                                                                                           |     |     |
|--------------|-------------------------------------------------------------------------------------------------------------------------------------------------------------------------------------------|-----|-----|
| <b>H0103</b> | Neu5Gc- $\alpha$ -2,6-Gal- $\beta$ -1,4-GlcNAc- $\beta$ -1,3-(Neu5Gc- $\alpha$ -2,6-Gal- $\beta$ -1,4-GlcNAc- $\beta$ -1,6-)Gal- $\beta$ -1,4-Glc-Sp5                                     | 87  | 5   |
| <b>H0105</b> | Fuc- $\alpha$ -1,2-Gal- $\beta$ -1,4-GlcNAc- $\beta$ -1,3-(Fuc- $\alpha$ -1,2-Gal- $\beta$ -1,4-GlcNAc- $\beta$ -1,6-)Gal- $\beta$ -1,4-Glc-Sp5                                           | 85  | 5   |
| <b>H0106</b> | Fuc- $\alpha$ -1,2-Gal- $\beta$ -1,4-(Fuc- $\alpha$ -1,3-)GlcNAc- $\beta$ -1,3-[Fuc- $\alpha$ -1,2-Gal- $\beta$ -1,4-(Fuc- $\alpha$ -1,3-)GlcNAc- $\beta$ -1,6-]Gal- $\beta$ -1,4-Glc-Sp5 | 69  | 6   |
| <b>H0200</b> | Gal- $\beta$ -1,4-GlcNAc- $\beta$ -1,3-(GlcNAc- $\beta$ -1,6-)Gal- $\beta$ -1,4-Glc-Sp5                                                                                                   | 98  | 27  |
| <b>H0201</b> | Neu5Ac- $\alpha$ -2,6-Gal- $\beta$ -1,4-GlcNAc- $\beta$ -1,3-(GlcNAc- $\beta$ -1,6-)Gal- $\beta$ -1,4-Glc-Sp5                                                                             | 109 | 15  |
| <b>H0202</b> | Neu5Gc- $\alpha$ -2,6-Gal- $\beta$ -1,4-GlcNAc- $\beta$ -1,3-(GlcNAc- $\beta$ -1,6-)Gal- $\beta$ -1,4-Glc-Sp5                                                                             | 125 | 15  |
| <b>H0203</b> | Gal- $\beta$ -1,4-(Fuc- $\alpha$ -1,3-)GlcNAc- $\beta$ -1,3-(GlcNAc- $\beta$ -1,6-)Gal- $\beta$ -1,4-Glc-Sp5                                                                              | 91  | 16  |
| <b>H0204</b> | Fuc- $\alpha$ -1,2-Gal- $\beta$ -1,4-GlcNAc- $\beta$ -1,3-(GlcNAc- $\beta$ -1,6-)Gal- $\beta$ -1,4-Glc-Sp5                                                                                | 97  | 2   |
| <b>H0205</b> | Neu5Ac- $\alpha$ -2,6-Gal- $\beta$ -1,4-GlcNAc- $\beta$ -1,3-(Gal- $\beta$ -1,4-GlcNAc- $\beta$ -1,6-)Gal- $\beta$ -1,4-Glc-Sp5                                                           | 90  | 1   |
| <b>H0207</b> | Gal- $\beta$ -1,4-(Fuc- $\alpha$ -1,3-)GlcNAc- $\beta$ -1,3-(Gal- $\beta$ -1,4-GlcNAc- $\beta$ -1,6-)Gal- $\beta$ -1,4-Glc-Sp5                                                            | 112 | 23  |
| <b>H0208</b> | Fuc- $\alpha$ -1,2-Gal- $\beta$ -1,4-GlcNAc- $\beta$ -1,3-(Gal- $\beta$ -1,4-GlcNAc- $\beta$ -1,6-)Gal- $\beta$ -1,4-Glc-Sp5                                                              | 144 | 5   |
| <b>H0209</b> | Fuc- $\alpha$ -1,2-Gal- $\beta$ -1,4-(Fuc- $\alpha$ -1,3-)GlcNAc- $\beta$ -1,3-(GlcNAc- $\beta$ -1,6-)Gal- $\beta$ -1,4-Glc-Sp5                                                           | 131 | 13  |
| <b>H0210</b> | Fuc- $\alpha$ -1,2-Gal- $\beta$ -1,4-(Fuc- $\alpha$ -1,3-)GlcNAc- $\beta$ -1,3-[Gal- $\beta$ -1,4-(Fuc- $\alpha$ -1,3-)GlcNAc- $\beta$ -1,6-]Gal- $\beta$ -1,4-Glc-Sp5                    | 148 | 3   |
| <b>H0300</b> | GlcNAc- $\beta$ -1,3-(Gal- $\beta$ -1,4-GlcNAc- $\beta$ -1,6-)Gal- $\beta$ -1,4-Glc-Sp5                                                                                                   | 124 | 13  |
| <b>H0301</b> | GlcNAc- $\beta$ -1,3-(Neu5Ac- $\alpha$ -2,6-Gal- $\beta$ -1,4-GlcNAc- $\beta$ -1,6-)Gal- $\beta$ -1,4-Glc-Sp5                                                                             | 104 | 11  |
| <b>H0303</b> | GlcNAc- $\beta$ -1,3-[Gal- $\beta$ -1,4-(Fuc- $\alpha$ -1,3-)GlcNAc- $\beta$ -1,6-]Gal- $\beta$ -1,4-Glc-Sp5                                                                              | 100 | 3   |
| <b>H0304</b> | Fuc- $\alpha$ -1,2-GlcNAc- $\beta$ -1,3-(Gal- $\beta$ -1,4-GlcNAc- $\beta$ -1,6-)Gal- $\beta$ -1,4-Glc-Sp5                                                                                | 100 | 9   |
| <b>H0305</b> | Gal- $\beta$ -1,4-GlcNAc- $\beta$ -1,3-(Neu5Ac- $\alpha$ -2,6-Gal- $\beta$ -1,4-GlcNAc- $\beta$ -1,6-)Gal- $\beta$ -1,4-Glc-Sp5                                                           | 70  | 2   |
| <b>H0306</b> | Gal- $\beta$ -1,4-GlcNAc- $\beta$ -1,3-(Neu5Gc- $\alpha$ -2,6-Gal- $\beta$ -1,4-GlcNAc- $\beta$ -1,6-)Gal- $\beta$ -1,4-Glc-Sp5                                                           | 71  | 15  |
| <b>H0307</b> | Gal- $\beta$ -1,4-GlcNAc- $\beta$ -1,3-[Gal- $\beta$ -1,4-(Fuc- $\alpha$ -1,3-)GlcNAc- $\beta$ -1,6-]Gal- $\beta$ -1,4-Glc-Sp5                                                            | 104 | 15  |
| <b>H0400</b> | Gal- $\beta$ -1,4-Glc-Sp                                                                                                                                                                  | 879 | 178 |
| <b>H0402</b> | GalNAc- $\beta$ -1,3-Gal- $\beta$ -1,4-Glc-Sp                                                                                                                                             | 204 | 2   |
| <b>H0403</b> | Neu5Ac- $\alpha$ -2,3-Gal- $\beta$ -1,4-Glc-Sp                                                                                                                                            | 404 | 11  |
| <b>H0404</b> | Neu5Gc- $\alpha$ -2,3-Gal- $\beta$ -1,4-Glc-Sp                                                                                                                                            | 316 | 23  |
| <b>H0405</b> | Neu5Ac- $\alpha$ -2,6-Gal- $\beta$ -1,4-Glc-Sp                                                                                                                                            | 335 | 43  |
| <b>H0406</b> | Neu5Gc- $\alpha$ -2,6-Gal- $\beta$ -1,4-Glc-Sp                                                                                                                                            | 365 | 64  |
| <b>H0407</b> | Gal- $\alpha$ -1,3-Gal- $\beta$ -1,4-Glc-Sp                                                                                                                                               | 246 | 8   |

|              |                                                                                                                                                |     |    |
|--------------|------------------------------------------------------------------------------------------------------------------------------------------------|-----|----|
| <b>H0408</b> | Neu5Ac- $\alpha$ -2,8-Neu5Ac- $\alpha$ -2,3-Gal- $\beta$ -1,4-Glc-Sp                                                                           | 47  | 12 |
| <b>H0409</b> | Neu5Ac- $\alpha$ -2,8-Neu5Ac- $\alpha$ -2,6-Gal- $\beta$ -1,4-Glc-Sp                                                                           | 109 | 22 |
| <b>H0410</b> | Neu5Ac- $\alpha$ -2,3-Gal- $\alpha$ -1,3-Gal- $\beta$ -1,4-Glc-Sp                                                                              | 195 | 16 |
| <b>H0411</b> | Neu5Ac- $\alpha$ -2,6-Gal- $\alpha$ -1,3-Gal- $\beta$ -1,4-Glc-Sp                                                                              | 239 | 43 |
| <b>H0500</b> | Gal- $\alpha$ -1,4-Gal- $\beta$ -1,4-Glc-Sp5                                                                                                   | 210 | 2  |
| <b>H0503</b> | GalNAc- $\beta$ -1,3-Gal- $\alpha$ -1,4-Gal- $\beta$ -1,4-Glc-Sp5                                                                              | 128 | 20 |
| <b>H0504</b> | Gal- $\beta$ -1,3-GalNAc- $\beta$ -1,3-Gal- $\alpha$ -1,4-Gal- $\beta$ -1,4-Glc-Sp5                                                            | 95  | 5  |
| <b>H0505</b> | Fuc- $\alpha$ -1,2-Gal- $\beta$ -1,3-GalNAc- $\beta$ -1,3-Gal- $\alpha$ -1,4-Gal- $\beta$ -1,4-Glc-Sp5                                         | 78  | 2  |
| <b>H0600</b> | Gal- $\beta$ -1,4-GlcNAc- $\beta$ -1,3-Gal- $\beta$ -1,4-Glc-Sp5                                                                               | 99  | 22 |
| <b>H0601</b> | Gal- $\beta$ -1,4-(Fuc- $\alpha$ -1,3-)GlcNAc- $\beta$ -1,3-Gal- $\beta$ -1,4-Glc-Sp5                                                          | 153 | 19 |
| <b>H0602</b> | Fuc- $\alpha$ -1,2-Gal- $\beta$ -1,4-GlcNAc- $\beta$ -1,3-Gal- $\beta$ -1,4-Glc-Sp5                                                            | 127 | 13 |
| <b>H0603</b> | GlcNAc- $\beta$ -1,3-Gal- $\beta$ -1,4-GlcNAc- $\beta$ -1,3-Gal- $\beta$ -1,4-Glc-Sp5                                                          | 133 | 10 |
| <b>H0604</b> | Neu5Ac- $\alpha$ -2,3-Gal- $\beta$ -1,4-GlcNAc- $\beta$ -1,3-Gal- $\beta$ -1,4-Glc-Sp5                                                         | 105 | 14 |
| <b>H0606</b> | Gal- $\beta$ -1,4-GlcNAc- $\beta$ -1,3-(Neu5Ac- $\alpha$ -2,6-)Gal- $\beta$ -1,4-Glc-Sp5                                                       | 131 | 19 |
| <b>H0608</b> | Fuc- $\alpha$ -1,2-Gal- $\beta$ -1,4-(Fuc- $\alpha$ -1,3-)GlcNAc- $\beta$ -1,3-Gal- $\beta$ -1,4-Glc-Sp5                                       | 151 | 1  |
| <b>H0609</b> | Neu5Ac- $\alpha$ -2,3-Gal- $\beta$ -1,4-(Fuc- $\alpha$ -1,3-)GlcNAc- $\beta$ -1,3-Gal- $\beta$ -1,4-Glc-Sp5                                    | 146 | 11 |
| <b>H0610</b> | GlcNAc- $\beta$ -1,3-Gal- $\beta$ -1,4-(Fuc- $\alpha$ -1,3-)GlcNAc- $\beta$ -1,3-Gal- $\beta$ -1,4-Glc-Sp5                                     | 263 | 5  |
| <b>H0700</b> | Gal- $\beta$ -1,4-GlcNAc- $\beta$ -1,3-Gal- $\beta$ -1,4-GlcNAc- $\beta$ -1,3-Gal- $\beta$ -1,4-Glc-Sp5                                        | 90  | 7  |
| <b>H0701</b> | GlcNAc- $\beta$ -1,3-Gal- $\beta$ -1,4-GlcNAc- $\beta$ -1,3-Gal- $\beta$ -1,4-GlcNAc- $\beta$ -1,3-Gal- $\beta$ -1,4-Glc-Sp5                   | 140 | 13 |
| <b>H0800</b> | Gal- $\beta$ -1,4-GlcNAc- $\beta$ -1,3-Gal- $\beta$ -1,4-GlcNAc- $\beta$ -1,3-Gal- $\beta$ -1,4-GlcNAc- $\beta$ -1,3-Gal- $\beta$ -1,4-Glc-Sp5 | 90  | 0  |
| <b>H0900</b> | Gal- $\beta$ -1,3-GlcNAc- $\beta$ -1,3-(GlcNAc- $\beta$ -1,6-)Gal- $\beta$ -1,4-Glc-Sp5                                                        | 199 | 1  |
| <b>L1001</b> | Neu5Ac- $\alpha$ -2,3-Gal- $\beta$ -1,4-Glc-Sp5                                                                                                | 83  | 10 |
| <b>L1002</b> | Neu5Gc- $\alpha$ -2,3-Gal- $\beta$ -1,4-Glc-Sp5                                                                                                | 126 | 11 |
| <b>L1003</b> | Kdn- $\alpha$ -2,3-Gal- $\beta$ -1,4-Glc-Sp5                                                                                                   | 126 | 4  |
| <b>L1011</b> | Neu5Ac- $\alpha$ -2,3-(GalNAc-b-1,4-)Gal-b-1,4-Glc-Sp5                                                                                         | 48  | 8  |
| <b>L1012</b> | Neu5Gc- $\alpha$ -2,3-(GalNAc-b-1,4-)Gal-b-1,4-Glc-Sp5                                                                                         | 68  | 10 |
| <b>L1013</b> | Kdn- $\alpha$ -2,3-(GalNAc-b-1,4-)Gal-b-1,4-Glc-Sp5                                                                                            | 55  | 14 |

|              |                                                                                                |     |    |
|--------------|------------------------------------------------------------------------------------------------|-----|----|
| <b>L1021</b> | Neu5Ac-a-2,3-(Gal-b-1,3-GalNAc-b-1,4-)Gal-b-1,4-Glc-Sp5                                        | 50  | 7  |
| <b>L1022</b> | Neu5Gc-a-2,3-(Gal-b-1,3-GalNAc-b-1,4-)Gal-b-1,4-Glc-Sp5                                        | 79  | 7  |
| <b>L1023</b> | Kdn-a-2,3-(Gal-b-1,3-GalNAc-b-1,4-)Gal-b-1,4-Glc-Sp5                                           | 154 | 7  |
| <b>L1201</b> | Neu5Ac- $\alpha$ -2,8-Neu5Ac- $\alpha$ -2,3-Gal- $\beta$ -1,4-Glc-Sp5                          | 58  | 13 |
| <b>L1202</b> | Neu5Gc- $\alpha$ -2,8-Neu5Ac- $\alpha$ -2,3-Gal- $\beta$ -1,4-Glc-Sp5                          | 88  | 2  |
| <b>L1203</b> | Kdn- $\alpha$ -2,8-Neu5Ac- $\alpha$ -2,3-Gal- $\beta$ -1,4-Glc-Sp5                             | 77  | 17 |
| <b>L1204</b> | Neu5Ac- $\alpha$ -2,8-Neu5Gc- $\alpha$ -2,3-Gal- $\beta$ -1,4-Glc-Sp5                          | 47  | 9  |
| <b>L1205</b> | Neu5Gc- $\alpha$ -2,8-Neu5Gc- $\alpha$ -2,3-Gal- $\beta$ -1,4-Glc-Sp5                          | 43  | 1  |
| <b>L1206</b> | Kdn- $\alpha$ -2,8-Neu5Gc- $\alpha$ -2,3-Gal- $\beta$ -1,4-Glc-Sp5                             | 25  | 13 |
| <b>L1207</b> | Neu5Ac- $\alpha$ -2,8-Kdn- $\alpha$ -2,3-Gal- $\beta$ -1,4-Glc-Sp5                             | 35  | 4  |
| <b>L1209</b> | Kdn- $\alpha$ -2,8-Kdn- $\alpha$ -2,3-Gal- $\beta$ -1,4-Glc-Sp5                                | 54  | 3  |
| <b>L1211</b> | Neu5Ac- $\alpha$ -2,8-Neu5Ac- $\alpha$ -2,3-(GalNAc-b-1,4-)Gal- $\beta$ -1,4-Glc-Sp5           | 20  | 7  |
| <b>L1212</b> | Neu5Gc- $\alpha$ -2,8-Neu5Ac- $\alpha$ -2,3-(GalNAc-b-1,4-)Gal- $\beta$ -1,4-Glc-Sp5           | 23  | 4  |
| <b>L1213</b> | Kdn- $\alpha$ -2,8-Neu5Ac- $\alpha$ -2,3-(GalNAc-b-1,4-)Gal- $\beta$ -1,4-Glc-Sp5              | 28  | 2  |
| <b>L1214</b> | Neu5Ac- $\alpha$ -2,8-Neu5Gc- $\alpha$ -2,3-(GalNAc-b-1,4-)Gal- $\beta$ -1,4-Glc-Sp5           | 25  | 12 |
| <b>L1215</b> | Neu5Gc- $\alpha$ -2,8-Neu5Gc- $\alpha$ -2,3-(GalNAc-b-1,4-)Gal- $\beta$ -1,4-Glc-Sp5           | 22  | 1  |
| <b>L1216</b> | Kdn- $\alpha$ -2,8-Neu5Gc- $\alpha$ -2,3-(GalNAc-b-1,4-)Gal- $\beta$ -1,4-Glc-Sp5              | 21  | 10 |
| <b>L1221</b> | Neu5Ac- $\alpha$ -2,8-Neu5Ac- $\alpha$ -2,3-(Gal-b-1,3-GalNAc-b-1,4-)Gal- $\beta$ -1,4-Glc-Sp5 | 17  | 3  |
| <b>L1222</b> | Neu5Gc- $\alpha$ -2,8-Neu5Ac- $\alpha$ -2,3-(Gal-b-1,3-GalNAc-b-1,4-)Gal- $\beta$ -1,4-Glc-Sp5 | 33  | 3  |
| <b>L1225</b> | Neu5Gc- $\alpha$ -2,8-Neu5Gc- $\alpha$ -2,3-(Gal-b-1,3-GalNAc-b-1,4-)Gal- $\beta$ -1,4-Glc-Sp5 | 45  | 3  |
| <b>L1226</b> | Kdn- $\alpha$ -2,8-Neu5Gc- $\alpha$ -2,3-(Gal-b-1,3-GalNAc-b-1,4-)Gal- $\beta$ -1,4-Glc-Sp5    | 66  | 9  |
| <b>L2000</b> | GlcNAc- $\beta$ -1,3-Gal- $\beta$ -1,4-Glc-Sp5                                                 | 398 | 6  |
| <b>L2100</b> | Gal- $\beta$ -1,4-GlcNAc- $\beta$ -1,3-Gal- $\beta$ -1,4-Glc-Sp5                               | 121 | 12 |
| <b>L2101</b> | Gal-a-1,3-Gal- $\beta$ -1,4-GlcNAc- $\beta$ -1,3-Gal- $\beta$ -1,4-Glc-Sp5                     | 90  | 8  |
| <b>L2102</b> | Gal-a-1,4-Gal- $\beta$ -1,4-GlcNAc- $\beta$ -1,3-Gal- $\beta$ -1,4-Glc-Sp5                     | 120 | 18 |
| <b>L2111</b> | Neu5Ac-a-2,3-Gal- $\beta$ -1,4-GlcNAc- $\beta$ -1,3-Gal- $\beta$ -1,4-Glc-Sp5                  | 84  | 4  |
| <b>L2112</b> | Neu5Gc-a-2,3-Gal- $\beta$ -1,4-GlcNAc- $\beta$ -1,3-Gal- $\beta$ -1,4-Glc-Sp5                  | 20  | 1  |

|              |                                                                                         |     |    |
|--------------|-----------------------------------------------------------------------------------------|-----|----|
| <b>L2113</b> | Kdn-a-2,3-Gal-β-1,4-GlcNAc-β-1,3-Gal-β-1,4-Glc-Sp5                                      | 62  | 5  |
| <b>L2121</b> | Neu5Ac-a-2,8-Neu5Ac-a-2,3-Gal-β-1,4-GlcNAc-β-1,3-Gal-β-1,4-Glc-Sp5                      | 20  | 15 |
| <b>L2122</b> | Neu5Gc-a-2,8-Neu5Ac-a-2,3-Gal-β-1,4-GlcNAc-β-1,3-Gal-β-1,4-Glc-Sp5                      | 59  | 9  |
| <b>L2103</b> | Gal-β-1,4-(Fuc-α-1,3-)GlcNAc-β-1,3-Gal-β-1,4-Glc-Sp5                                    | 105 | 30 |
| <b>L2104</b> | Gal-a-1,3-Gal-β-1,4-(Fuc-α-1,3-)GlcNAc-β-1,3-Gal-β-1,4-Glc-Sp5                          | 119 | 0  |
| <b>L2131</b> | Neu5Ac-a-2,3-Gal-β-1,4-(Fuc-α-1,3-)GlcNAc-β-1,3-Gal-β-1,4-Glc-Sp5                       | 97  | 12 |
| <b>L2132</b> | Neu5Gc-a-2,3-Gal-β-1,4-(Fuc-α-1,3-)GlcNAc-β-1,3-Gal-β-1,4-Glc-Sp5                       | 76  | 1  |
| <b>L2133</b> | Kdn-a-2,3-Gal-β-1,4-(Fuc-α-1,3-)GlcNAc-β-1,3-Gal-β-1,4-Glc-Sp5                          | 92  | 1  |
| <b>L2191</b> |                                                                                         | 86  | 20 |
| <b>L2192</b> |                                                                                         | 64  | 7  |
| <b>L2200</b> | GlcNAc-β-1,3-Gal-β-1,4-GlcNAc-β-1,3-Gal-β-1,4-Glc-Sp5                                   | 96  | 9  |
| <b>L2300</b> | Gal-β-1,4-GlcNAc-β-1,3-Gal-β-1,4-GlcNAc-β-1,3-Gal-β-1,4-Glc-Sp5                         | 75  | 5  |
| <b>L2301</b> | Gal-a-1,3-Gal-β-1,4-GlcNAc-β-1,3-Gal-β-1,4-GlcNAc-β-1,3-Gal-β-1,4-Glc-Sp5               | 63  | 0  |
| <b>L2302</b> | Gal-a-1,4-Gal-β-1,4-GlcNAc-β-1,3-Gal-β-1,4-GlcNAc-β-1,3-Gal-β-1,4-Glc-Sp5               | 69  | 10 |
| <b>L2311</b> | Neu5Ac-a-2,3-Gal-β-1,4-GlcNAc-β-1,3-Gal-β-1,4-GlcNAc-β-1,3-Gal-β-1,4-Glc-Sp5            | 50  | 7  |
| <b>L2312</b> | Neu5Gc-a-2,3-Gal-β-1,4-GlcNAc-β-1,3-Gal-β-1,4-GlcNAc-β-1,3-Gal-β-1,4-Glc-Sp5            | 69  | 6  |
| <b>L2303</b> | Gal-β-1,4-GlcNAc-β-1,3-Gal-β-1,4-(Fuc-α-1,3-)GlcNAc-β-1,3-Gal-β-1,4-Glc-Sp5             | 68  | 4  |
| <b>L2304</b> | Gal-β-1,4-(Fuc-α-1,3-)GlcNAc-β-1,3-Gal-β-1,4-(Fuc-α-1,3-)GlcNAc-β-1,3-Gal-β-1,4-Glc-Sp5 | 74  | 7  |
| <b>L2391</b> |                                                                                         | 70  | 4  |
| <b>L2392</b> |                                                                                         | 76  | 5  |
| <b>L2900</b> | Gal-β-1,3-GlcNAc-β-1,3-Gal-β-1,4-Glc-Sp5                                                | 282 | 29 |
| <b>L2911</b> | Neu5Ac-a-2,3-Gal-β-1,3-GlcNAc-β-1,3-Gal-β-1,4-Glc-Sp5                                   | 116 | 9  |
| <b>L2912</b> | Neu5Gc-a-2,3-Gal-β-1,3-GlcNAc-β-1,3-Gal-β-1,4-Glc-Sp5                                   | 120 | 25 |
| <b>L2913</b> | Kdn-a-2,3-Gal-β-1,3-GlcNAc-β-1,3-Gal-β-1,4-Glc-Sp5                                      | 104 | 15 |
| <b>L3100</b> | Gal-α-1,4-Gal-β-1,4-Glc-Sp5                                                             | 113 | 4  |
| <b>L3101</b> | GalNAc-β-1,3-Gal-α-1,4-Gal-β-1,4-Glc-Sp5                                                | 78  | 18 |
| <b>L3102</b> | Gal-β-1,3-GalNAc-β-1,3-Gal-α-1,4-Gal-β-1,4-Glc-Sp5                                      | 87  | 29 |

|              |                                                                 |     |    |
|--------------|-----------------------------------------------------------------|-----|----|
| <b>L3111</b> | Neu5Ac-a-2,3-Gal-β-1,3-GalNAc-β-1,3-Gal-α-1,4-Gal-β-1,4-Glc-Sp5 | 44  | 12 |
| <b>L3112</b> | Neu5Gc-a-2,3-Gal-β-1,3-GalNAc-β-1,3-Gal-α-1,4-Gal-β-1,4-Glc-Sp5 | 55  | 2  |
| <b>L3113</b> | Kdn-a-2,3-Gal-β-1,3-GalNAc-β-1,3-Gal-α-1,4-Gal-β-1,4-Glc-Sp5    | 75  | 8  |
| <b>L3103</b> |                                                                 | 84  | 4  |
| <b>L3200</b> | Gal-α-1,3-Gal-β-1,4-Glc-Sp5                                     | 111 | 2  |
| <b>L3201</b> | GalNAc-β-1,3-Gal-α-1,3-Gal-β-1,4-Glc-Sp5                        | 79  | 10 |
| <b>L3202</b> | Gal-β-1,3-GalNAc-β-1,3-Gal-α-1,3-Gal-β-1,4-Glc-Sp5              | 70  | 13 |
| <b>L3211</b> | Neu5Ac-a-2,3-Gal-β-1,3-GalNAc-β-1,3-Gal-α-1,3-Gal-β-1,4-Glc-Sp5 | 65  | 5  |
| <b>L3212</b> | Neu5Gc-a-2,3-Gal-β-1,3-GalNAc-β-1,3-Gal-α-1,3-Gal-β-1,4-Glc-Sp5 | 67  | 9  |
| <b>L3213</b> | Kdn-a-2,3-Gal-β-1,3-GalNAc-β-1,3-Gal-α-1,3-Gal-β-1,4-Glc-Sp5    | 71  | 3  |

---
